# Supplementary material for: MYB Transcription Factors Regulate Glucosinolate Biosynthesis in Different Organs of Chinese Cabbage (Brassica rapa ssp. pekinensis)
Source: Molecules. 2013 Jul 22;18(7):8682–95. doi: 10.3390/molecules18078682 (PMC6269701; doi:10.3390/molecules18078682)
Supplement: Supplementary file 1 [file molecules-18-08682-s001.pdf]

# Supplementary Information

**Table S1.** List of real-time RT-PCR primers used in this study.

| Primer                          | Sequence (5' → 3')                | Annealing Temp (°C) | Size (bp) |
|---------------------------------|-----------------------------------|---------------------|-----------|
| Bra031588-F ( <i>Dofl.1-1</i> ) | AACAGTCATGACAACAACAGTGA           | 52                  | 197       |
| Bra031588-R                     | GGTTGTTCTTCCATCTTCACCG            |                     |           |
| Bra030696-F ( <i>Dofl.1-2</i> ) | ATGGACGAAACATAGCAGCTCC            | 52                  | 248       |
| Bra030696-R                     | TCTAGACAAGTTAACCAAACCGGGT         |                     |           |
| Bra034081-F ( <i>IQD1-1-1</i> ) | AGAGTTGATAAGGTCAAACGTAAGAAG       | 50                  | 218       |
| Bra034081-R                     | CTTCTTGCCAAATGTCCTCTAAATA         |                     |           |
| Bra001299-F ( <i>IQD1-1-2</i> ) | CCAAGAGCTCTGATAAGAACCGTAG         | 51                  | 273       |
| Bra001299-R                     | TGGTCGCAGCAGCTGAGC                |                     |           |
| Bra012961-F ( <i>MYB28-1</i> )  | ACCATACTGTCAACACGCCTCC            | 52                  | 219       |
| Bra012961-R                     | CAGAAGTGACCTTAGCCGCAAC            |                     |           |
| Bra035929-F ( <i>MYB28-2</i> )  | ACCCTACAGTACCTGAGAATTTGCA         | 51                  | 200       |
| Bra035929-R                     | ACTTGATTTCTTAAACGTTTCTTGC         |                     |           |
| Bra029311-F ( <i>MYB28-3</i> )  | AATACCATATGAAAGCTTTTCCAATG        | 52                  | 238       |
| Bra029311-R                     | AGGAAGATCATGACCATACTGATCG         |                     |           |
| Bra005949-F ( <i>MYB29</i> )    | CTGTCTCCTCCGTGTCTCAA              | 54                  | 148       |
| Bra005949-R                     | CCTCGGCTGCATTGTTACTA              |                     |           |
| Bra013000-F ( <i>MYB34-1</i> )  | ACACCGGCGACGTCGATTC               | 53                  | 229       |
| Bra013000-R                     | TCTAACTCCTCCATAAGGCCAACA          |                     |           |
| Bra035954-F ( <i>MYB34-2</i> )  | CACAATCGTCGCCGACG                 | 51                  | 270       |
| Bra035954-R                     | GGCGAACCCCTTAATCTCTCCG            |                     |           |
| Bra029350-F ( <i>MYB34-3</i> )  | AACAAAGCGGCGGCAAG                 | 52                  | 186       |
| Bra029350-R                     | ATCCCTCAACTCTTCCATAATGCAA         |                     |           |
| Bra029349-F ( <i>MYB34-4</i> )  | CCAACCGGTTTCGAACCAG               | 52                  | 264       |
| Bra029349-R                     | GAATACGTCAAGATCATCGGAGAA          |                     |           |
| Bra025666-F ( <i>MYB51-1</i> )  | GATCTCCGAAACCAGCAAATCA            | 51                  | 240       |
| Bra025666-R                     | GTAGTAATGAGTGGGCCACCACT           |                     |           |
| Bra031035-F ( <i>MYB51-2</i> )  | ATCTCCGACAAATCAGAAAACCTC          | 51                  | 236       |
| Bra031035-R                     | GTAGTAGTAAGTGGGCCACCACTTC         |                     |           |
| Bra016553-F ( <i>MYB51-3</i> )  | TCAGAAAATTTGCAGGATATTCTGG         | 51                  | 230       |
| Bra016553-R                     | ACGGTGACACTTGTAGTAATAGTAGTAGTGTTA |                     |           |
| Bra015939-F ( <i>MYB122-1</i> ) | TGTTTCTCATGATGATGAAGATTTCTTG      | 53                  | 184       |
| Bra015939-R                     | CCAGTTGTCAATCCCTTCAAAGG           |                     |           |
| Bra008131-F ( <i>MYB122-2</i> ) | TTGAATGATGTTGTATCTCATGATGATG      | 53                  | 190       |
| Bra008131-R                     | AGTTGTCAATCCCTTCAAAGGAAACA        |                     |           |
| BraActin-F                      | TAGTGTTGTTGGTAGGCCAAGACAT         | 53                  | 188       |
| BraActin-R                      | GGAGCTCGTTGTAGAAAGTGTGATG         |                     |           |
